# Supplementary material for: Maturation- and aging-related differences in electrophysiological correlates of error detection and error awareness
Source: PubMed Central journal article supplement (PMC7322543; doi:10.1016/j.neuropsychologia.2020.107476), 2020-06
Supplement: mmc1.pdf [file mmc1.pdf]

Supplemental material

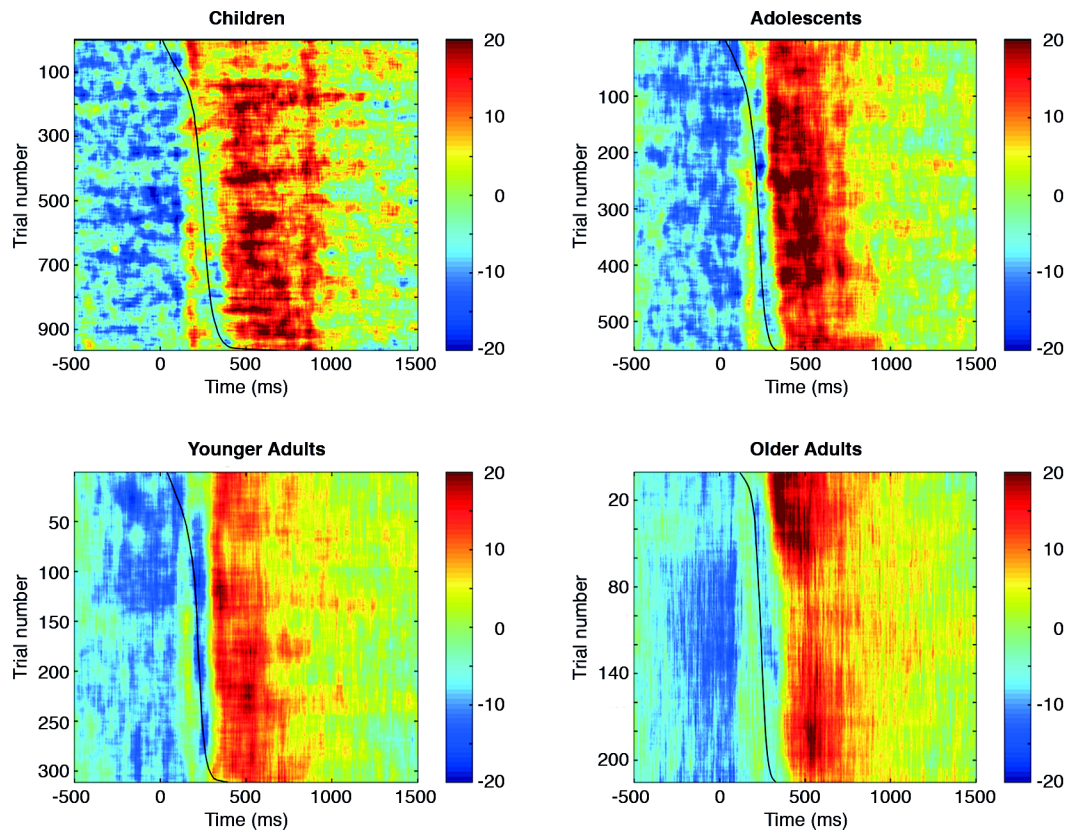

**Fig. S1.** Relation between ERP mean amplitudes and reaction time (indicated by the black line) across trials (sorted by trial number) and time within trials (-500 ms before to 1500 ms after response).
